# Supplementary material for: A TiO2 nanofiber/activated carbon composite as a novel effective electrode material for capacitive deionization of brackish water
Source: Royal Society of Chemistry journal article supplement (doi:10.1039/c4ra09948f), 2014-01-01
Supplement: c4ra09948f1.pdf [file c4ra09948f1.pdf]

## **TiO<sub>2</sub> nanofibers/activated carbon composite as novel effective electrode material for capacitive deionization of brackish water**

**Ahmed G. El-Deen<sup>1</sup>, Jae-Hwan Choi<sup>2</sup>, Khalil Abdelrazek Khalil<sup>3,4</sup>, Abdulhakim A. Almajid<sup>3</sup> and Nasser A. M. Barakat<sup>1,5,\*</sup>**

<sup>1</sup>BioNanosystem Department, Chonbuk National University, Jeonju 561-756, South Korea

<sup>2</sup>Department of Chemical Engineering, Kongju National University, 1223-24 Cheonan-daero, Seobuk-gu, Cheonan, Chungnam 331-717, Republic of Korea

<sup>3</sup>Mechanical Engineering Department, King Saud University, P.O. Box 800, Riyadh 11421, Saudi Arabia

<sup>4</sup>Materials Engineering and Design Department, Aswan University, Aswan, Egypt

<sup>5</sup>Chemical Engineering Department, Faculty of Engineering, Minia University, El-Minia, Egypt

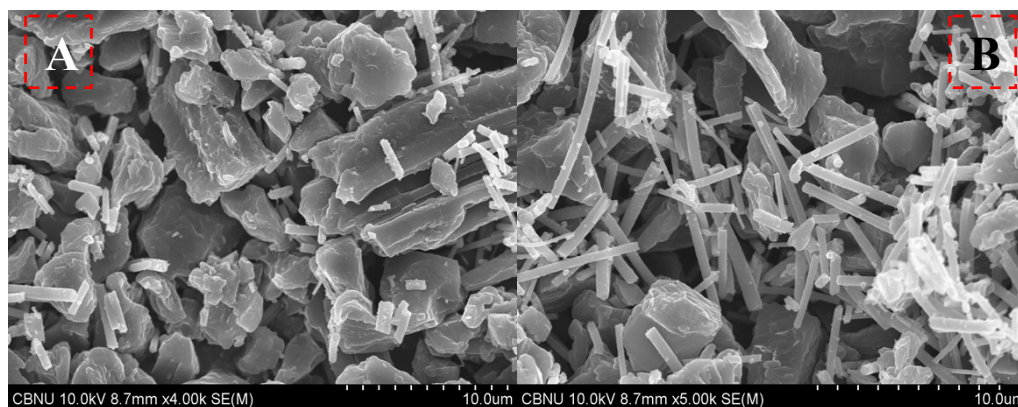

**Fig. S1 (A, B) SEM images of ACTNFs 5% and ACTNFs 15% composite electrode.**

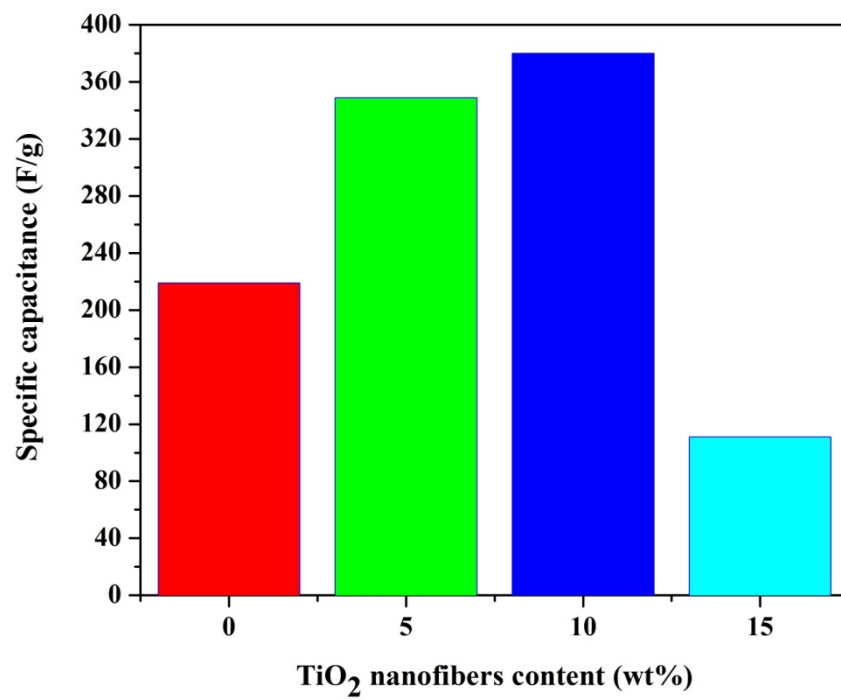

**Figure S2 specific capacitance versus TiO<sub>2</sub> nanofibers content.**

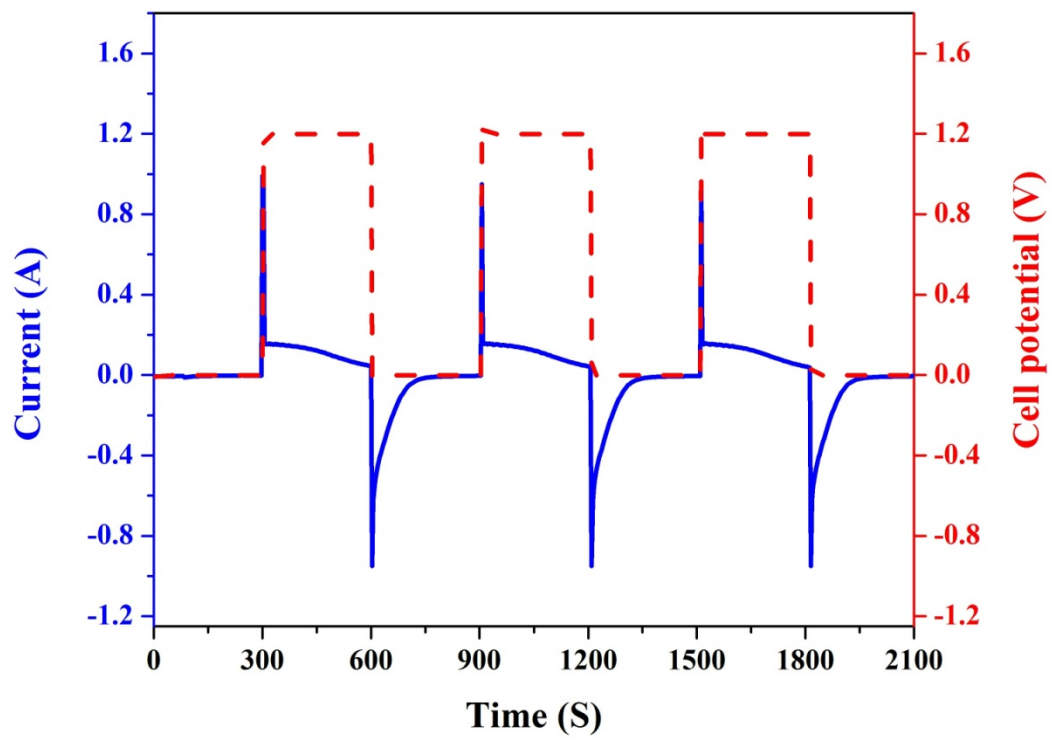

**Fig S3 Current changes versus applied cell potential during CDI operation.**
